# Supplementary material for: The Effect of Sodium–Glucose Cotransporter-2 Inhibitors on COVID-19 Patients with Type 2 Diabetes Mellitus: A Retrospective Cohort Study Using the Common Data Model
Source: MDPI journal article supplement (doi:10.3390/jcm13020431), 2024-01-12
Supplement: s1 [file s1]

Supplementary Materials

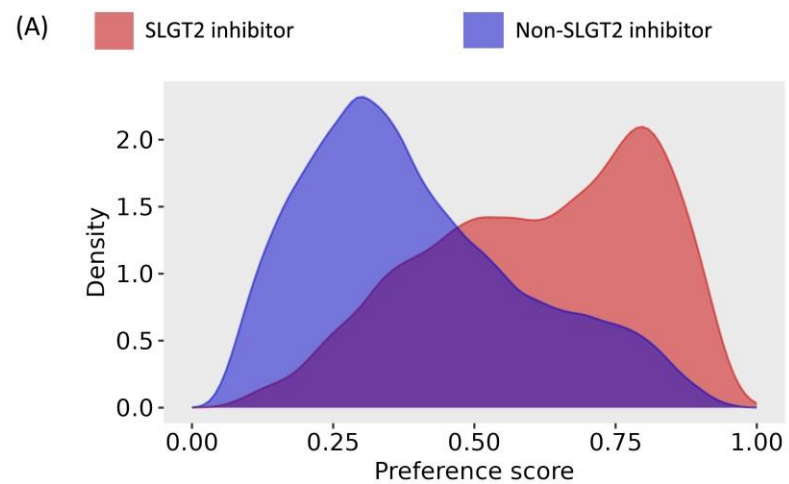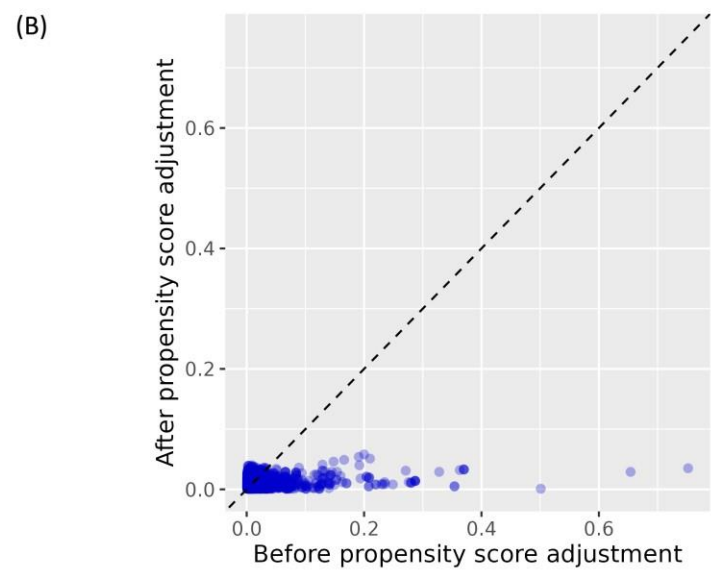

**Figure S1.** (A) propensity score, (B) covariate balance of the analysis of MACCE.

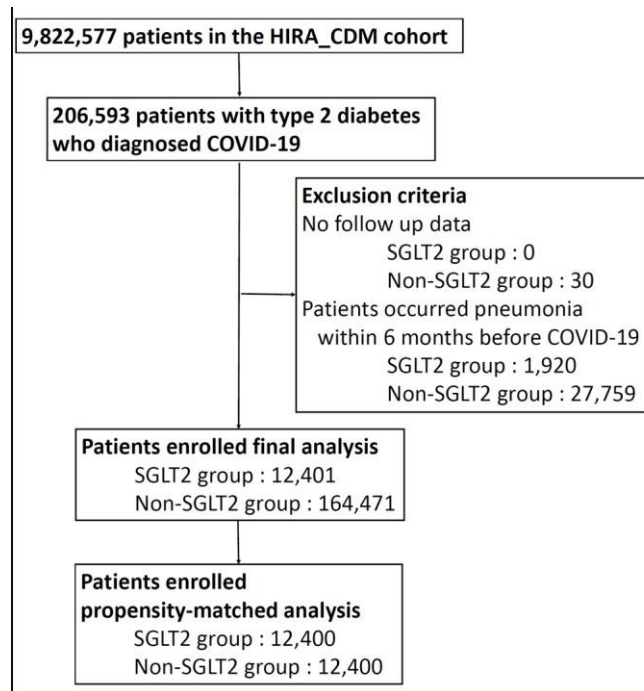

**Figure S2.** Attrition of analysis about pneumonia.

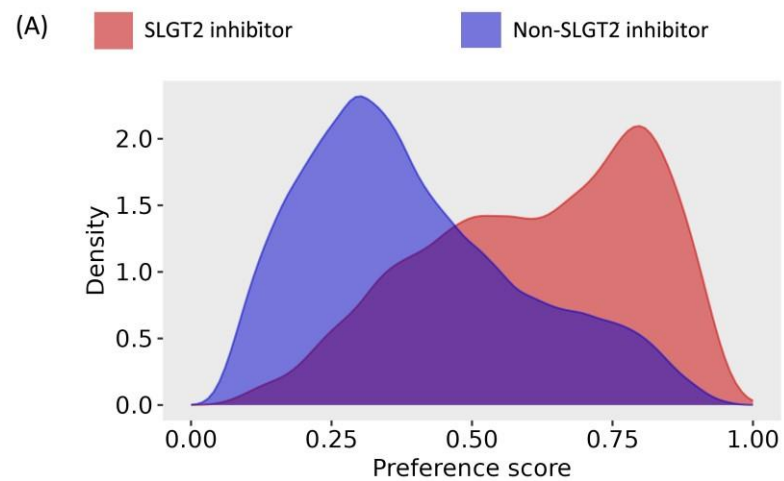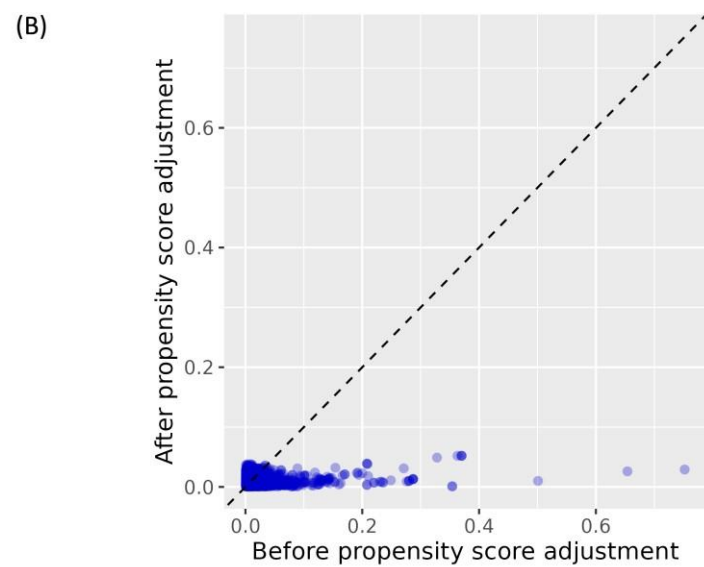

**Figure S3.** (A) propensity score, (B) covariate balance of the analysis of pneumonia.

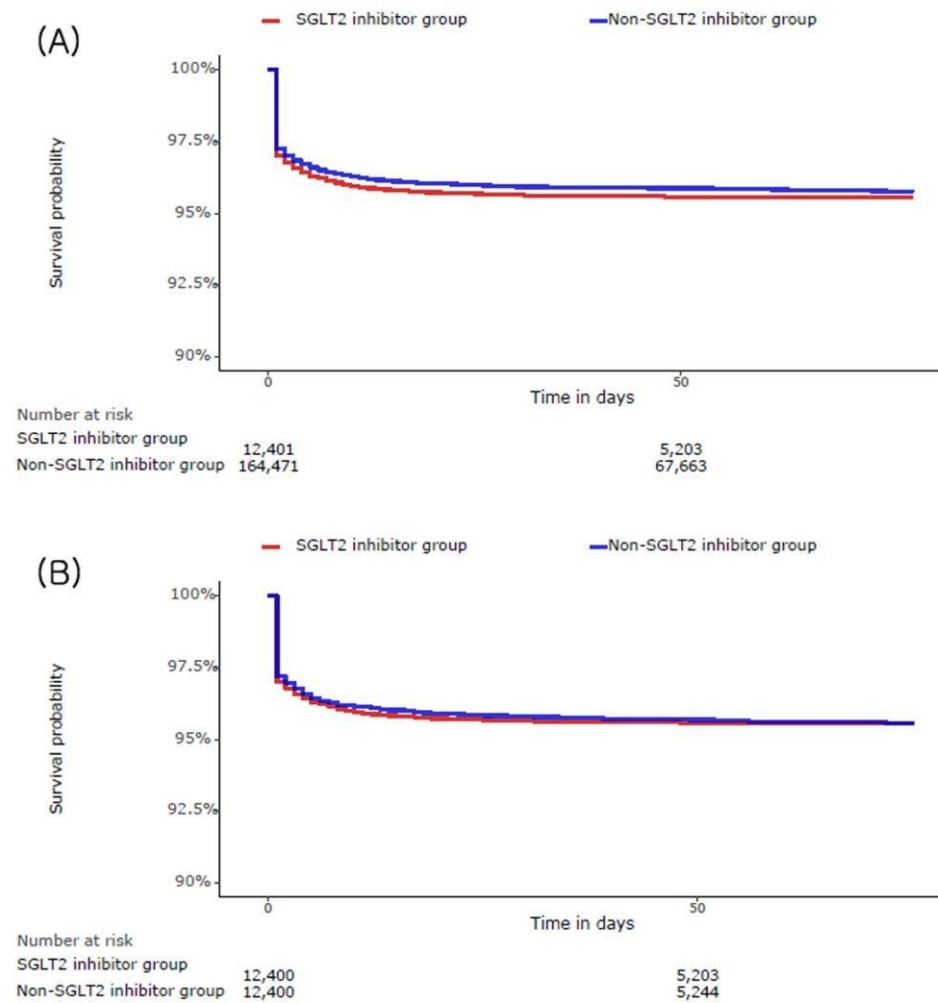

**Figure S4.** Kaplan-Meier curves for pneumonia in the (A) crude population and (B) propensity score matched population.
